# Supplementary material
Source: ML conference proceedings conference paper supplement (https://www.ecva.net/papers/eccv_2022/papers_ECCV/html/136990580_ECCV_2022_paper.php)
Supplement: Supplementary file 3 [file 136990580-supp.zip]

Archive with 8 entries (7 files):
- 5303-supp/
- __MACOSX/._5303-supp
- 5303-supp/supp.pdf
- __MACOSX/5303-supp/._supp.pdf
- 5303-supp/.DS_Store
- __MACOSX/5303-supp/._.DS_Store
- 5303-supp/qualitative_video.mp4
- __MACOSX/5303-supp/._qualitative_video.mp4
